# Supplementary material
Source: PubMed Central journal article supplement (PMC5589511)
Supplement: NIHMS901873-supplement-Supplementary_materials.pdf [file NIHMS901873-supplement-Supplementary_materials.pdf]

## **Childhood adiposity and fertility difficulties: The Bogalusa Heart Study**

Marni B. Jacobs,<sup>a, b</sup> Lydia A. Bazzano,<sup>a</sup> Gabriella Pridjian,<sup>c</sup> Emily W. Harville<sup>a</sup>

<sup>a</sup> Tulane University School of Public Health and Tropical Medicine, Department of Epidemiology, New Orleans, LA, USA

<sup>b</sup> Children's National Health System, Children's Research Institute, Department of Biostatistics and Study Methodology, Washington, DC, USA

<sup>c</sup> Tulane University School of Medicine, Department of Obstetrics and Gynecology, New Orleans, LA, USA

**Corresponding Author:** Marni Jacobs, 111 Michigan Ave., Center 6, CTS Suite, Washington, DC 20010, USA;  
p. +1 (202) 476-2253; f. +1 (202) 476-3425; e. [mjacobs@childrensnational.org](mailto:mjacobs@childrensnational.org)

**Table S1:** Childhood triceps skinfold (TRSF) thickness by time period and reported fertility difficulties in adulthood<sup>a</sup>

| ADIPOSIITY MEASURE                                    | FERTILITY DIFFICULTIES |             |              |                    |                  |             |                  |                    |
|-------------------------------------------------------|------------------------|-------------|--------------|--------------------|------------------|-------------|------------------|--------------------|
|                                                       | Medical Help           |             | Tried Unable |                    | Ever Sought Help |             | Any Difficulties |                    |
|                                                       | RR                     | 95% CI      | RR           | 95% CI             | RR               | 95% CI      | RR               | 95% CI             |
| Child (age < 9)                                       |                        |             |              |                    |                  |             |                  |                    |
| Normal (< 85 <sup>th</sup> percentile)                | Ref.                   | --          | Ref.         | --                 | Ref.             | --          | Ref.             | --                 |
| High (85 <sup>th</sup> – 94 <sup>th</sup> percentile) | 0.60                   | 0.26 – 1.38 | 1.18         | 0.77 – 1.81        | 1.00             | 0.59 – 1.68 | 1.07             | 0.71 – 1.61        |
| Very high (≥ 95 <sup>th</sup> percentile)             | 1.42                   | 0.65 – 3.11 | 1.46         | 0.93 – 2.30        | 1.20             | 0.69 – 2.11 | 1.36             | 0.90 – 2.07        |
| Early Teen (age 9 – 12)                               |                        |             |              |                    |                  |             |                  |                    |
| Normal (< 85 <sup>th</sup> percentile)                | Ref.                   | --          | Ref.         | --                 | Ref.             | --          | Ref.             | --                 |
| High (85 <sup>th</sup> – 94 <sup>th</sup> percentile) | 1.64                   | 0.95 – 2.84 | 1.33         | 0.94 – 1.88        | 1.40             | 0.94 – 2.10 | 1.32             | 0.95 – 1.84        |
| Very high (≥ 95 <sup>th</sup> percentile)             | 1.26                   | 0.53 – 3.00 | <b>1.63</b>  | <b>1.09 – 2.44</b> | 1.48             | 0.87 – 2.52 | <b>1.70</b>      | <b>1.18 – 2.47</b> |
| Late Teen (age 13 – 18)                               |                        |             |              |                    |                  |             |                  |                    |
| Normal (< 85 <sup>th</sup> percentile)                | Ref.                   | --          | Ref.         | --                 | Ref.             | --          | Ref.             | --                 |
| High (85 <sup>th</sup> – 94 <sup>th</sup> percentile) | 1.71                   | 0.91 – 3.23 | 1.02         | 0.68 – 1.52        | 1.22             | 0.78 – 1.90 | 1.03             | 0.71 – 1.50        |
| Very high (≥ 95 <sup>th</sup> percentile)             | 0.64                   | 0.09 – 4.50 | 1.11         | 0.64 – 1.94        | 0.97             | 0.40 – 2.34 | 1.26             | 0.76 – 2.09        |
| Ever ≥ 85th percentile age < 12                       | 1.20                   | 0.72 – 1.99 | 1.32         | 0.98 – 1.78        | 1.15             | 0.80 – 1.64 | <b>1.33</b>      | <b>1.00 – 1.76</b> |
| Ever ≥ 85th percentile age ≤ 18                       | 1.33                   | 0.83 – 2.13 | <b>1.36</b>  | <b>1.04 – 1.79</b> | 1.28             | 0.92 – 1.76 | <b>1.32</b>      | <b>1.02 – 1.69</b> |

<sup>a</sup> Results of log-binomial regression; estimates adjusted for education level, race, tobacco use history, current BMI, and adult income; numbers in bold significant at p < 0.05

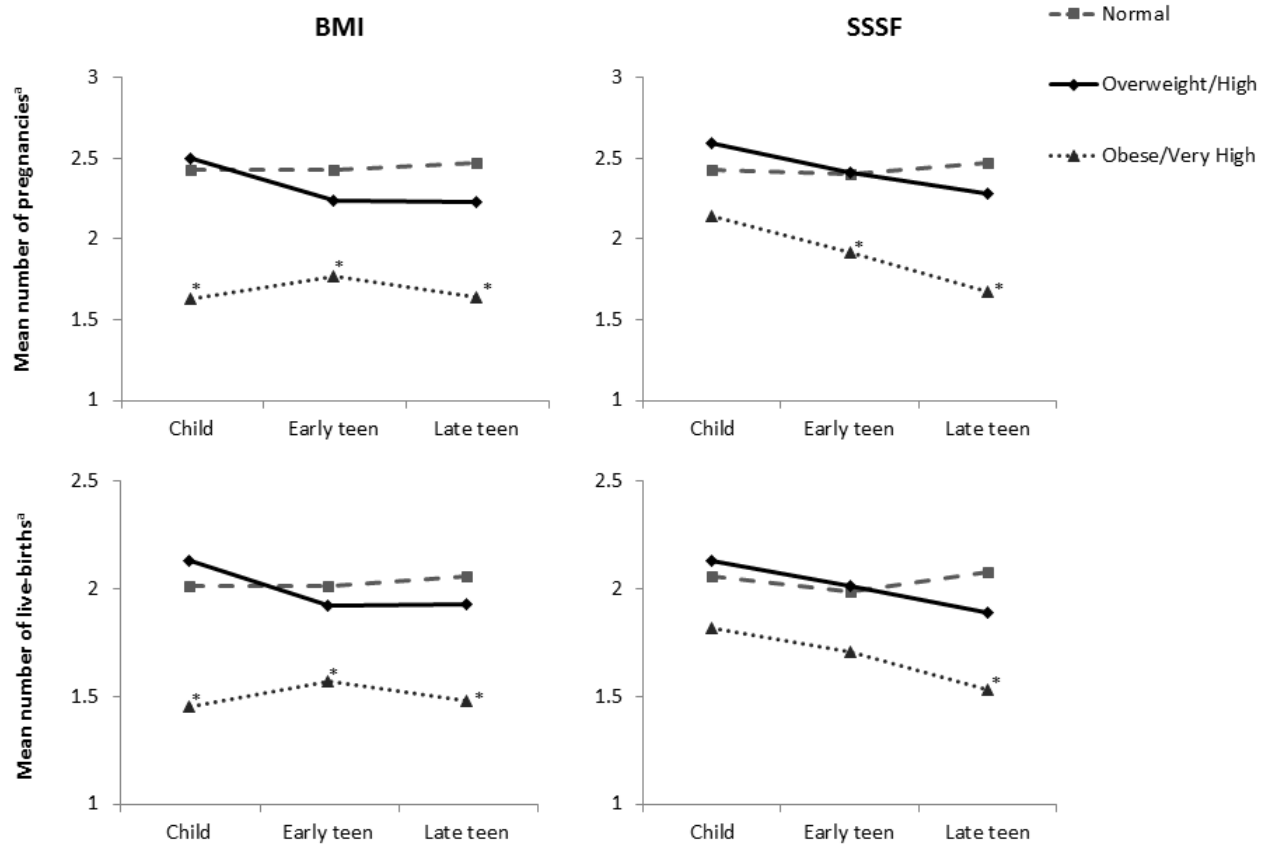

<sup>a</sup> Adjusted for education level, race, tobacco use history, current BMI, and adult income

\* Significantly different than "normal" group at p < 0.05

Figure S1: Mean number of pregnancies and live-births by body mass index (BMI) and subscapular skinfold (SSSF) thickness categories across age groups based on Poisson regression modeling
